# Supplementary material for: Highly efficient deep-blue fluorescence OLEDs with excellent charge balance based on phenanthro[9,10-d]oxazole-anthracene derivatives
Source: Royal Society of Chemistry journal article supplement (doi:10.1039/d0tc01811b), 2020-01-01
Supplement: d0tc01811b1.pdf [file d0tc01811b1.pdf]

## Electronic Supplementary Information (ESI)

# Highly Efficient Deep-Blue Fluorescence OLEDs with Excellent Charge Balance Based on Phenanthro[9,10-*d*]oxazole-Anthracene Derivatives

Seokwoo Kang,<sup>a</sup> Jin-Suk Huh,<sup>b</sup> Jang-Joo Kim<sup>\*b</sup> and Jongwook Park<sup>\*a</sup>

<sup>a</sup> Department of Chemical Engineering, Kyung Hee University, Gyeonggi, 17104, Korea

<sup>b</sup> Department of Material Science and Engineering, Research Institute of Advanced Materials (RIAM),  
Seoul National University of Korea, 08826, Korea

E-mail: [jjkim@snu.ac.kr](mailto:jjkim@snu.ac.kr) (Jang-Joo Kim), [jongpark@khu.ac.kr](mailto:jongpark@khu.ac.kr) (Jongwook Park)

### General information

Reagents and solvents were purchased as reagent grade and used without further purification. Analytical TLC was carried out on a Merck 60 F254 silica gel plate, and column chromatography was performed using Merck 60 silica gel (230–400 mesh). The <sup>1</sup>H-NMR spectra were recorded on Bruker Avance 300 spectrometers. The FAB+-mass and EI+-spectra were recorded on JMS-600W and JMS-700, 6890 Series mass spectrometers and Flash 1112 and Flash 2000 analyzers. The optical UV-Vis absorption spectra were obtained using a Lambda 1050 UV/Vis/NIR spectrometer (PerkinElmer). A PerkinElmer luminescence spectrometer LS55 (xenon flash tube) was used to perform PL spectroscopy. The glass transition temperatures (*T*<sub>g</sub>) of the compounds were obtained using DSC under a nitrogen atmosphere using a DSC 4000 thermal analyzer (PerkinElmer). The decomposition temperatures (*T*<sub>d</sub>) of the compounds were measured with TGA using a TGA 4000 thermogravimetric analyzer (PerkinElmer). The HOMO energy levels were determined with ultraviolet photoelectron yield spectroscopy (AC-2; Riken Keiki). The LUMO energy levels were derived from the HOMO energy levels and the band gaps.

### - Fabrication of thin films and OLEDs

Each thin film was fabricated by thermal evaporation in a vacuum of  $< 5 \times 10^{-7}$  Torr at a deposition rate of 1 Å sec<sup>-1</sup>.

### - PLQY of thin films

The PLQY of the thin films was determined using a photomultiplier tube (PMT; Acton Research Corp.) combined with an integrating sphere with a He:Cd laser as an excitation source.

### - Horizontal dipole ratio

The horizontal dipole ratios of the materials were obtained by fitting the angle-dependent  $p$ -polarized PL measurement results with optical calculation. The detailed experimental setup is described in our previous report.<sup>44</sup>

#### **- Transient PL decay profile**

Transient PL decay profiles of the films were measured using a streak camera (Hamamatsu Photonics) with a pulsed N<sub>2</sub> laser as an excitation source ( $\lambda = 325$  nm, pulse width = 700 ps; Ushio laser).

#### **- J-V-L/EQE/CE/ADEL**

The current densities of the OLEDs were measured using a source meter (Keithley 2400; Keithley). EL spectra, luminance, and current efficiencies in the normal direction of the OLEDs were measured using a spectroradiometer (PR650; Photo Research). The EQE values of the OLEDs were calibrated with angle-dependent EL (ADEL) spectra measurements. In the ADEL measurements, the device was automatically rotated using a rotation stage and the EL spectrum was measured using a fiber-coupled spectrometer (S2000; Ocean Optics Inc.).

#### **- Transient EL decay profile**

Transient EL decay profiles of the OLEDs were measured using a PMT combined with an oscilloscope (54642A; Agilent Technologies). Voltage pulses were applied to the OLEDs using a function/arbitrary waveform generator (33250A; Agilent Technologies). The pulse width and the frequency of the voltage pulses were 500  $\mu$ s and 100 Hz, respectively. To remove the effect of trapped and accumulated charges, a base voltage of  $-5$  V was applied.

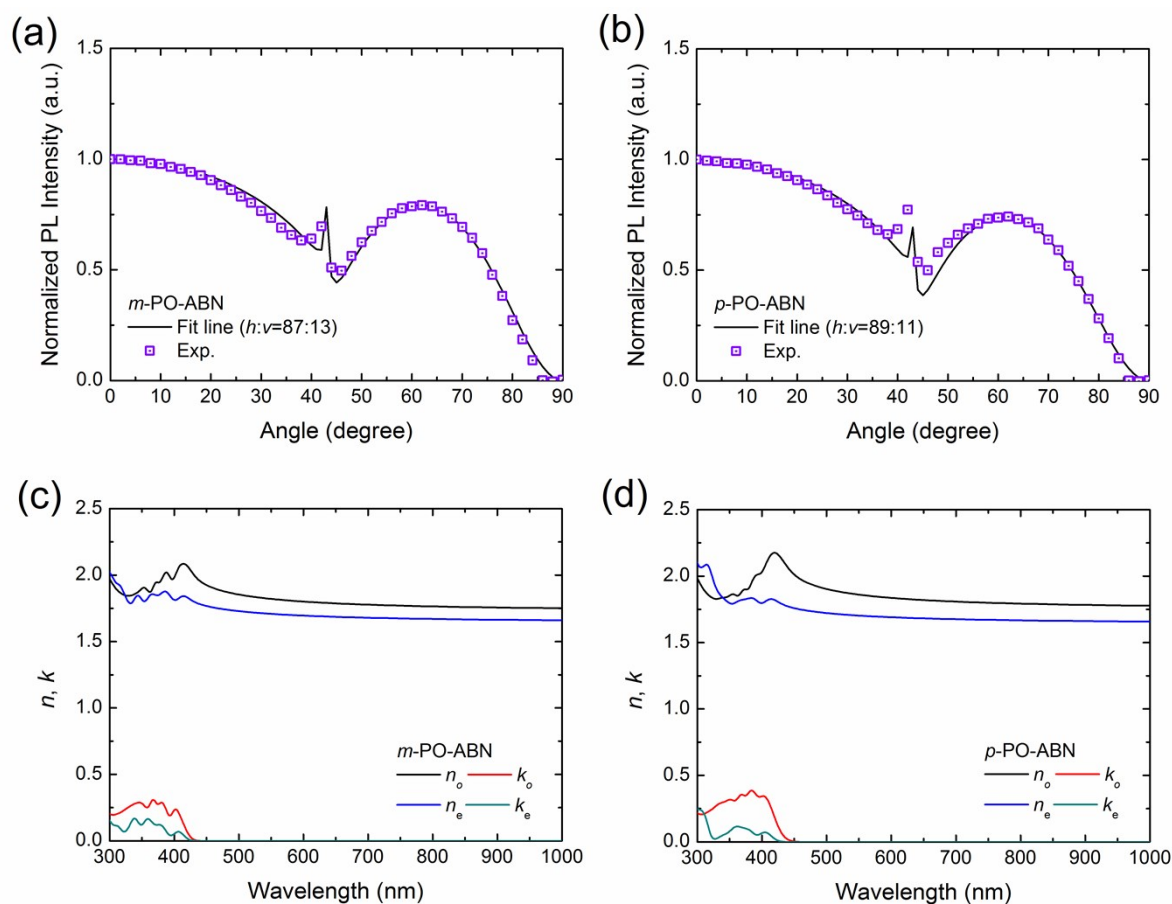

**Fig. S1** Angle-dependent  $p$ -polarized photoluminescence intensity profiles at the peak wavelength (symbol) along with a theoretical fit line (solid line) for (a) *m*-PO-ABN and (b) *ρ*-PO-ABN. Anisotropic refractive indices of (c) *m*-PO-ABN and (d) *ρ*-PO-ABN.

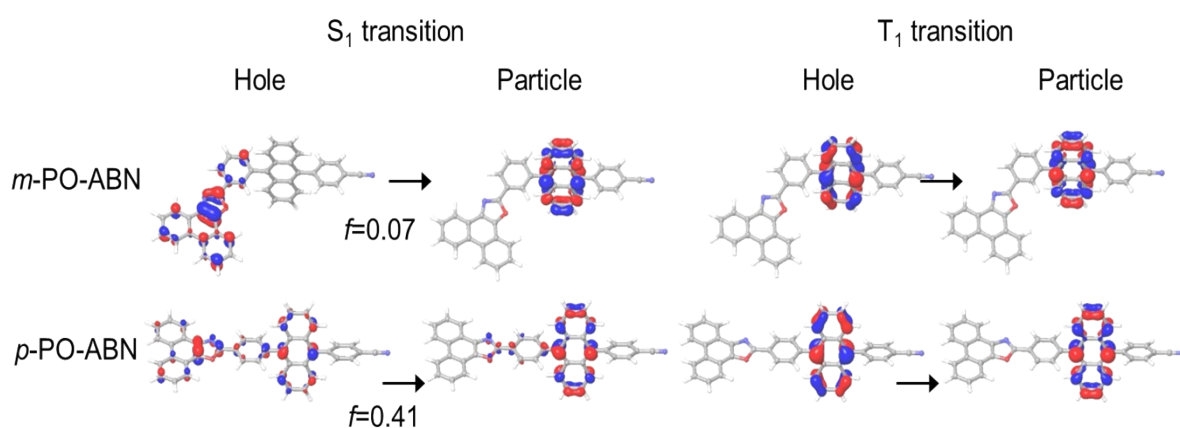

**Fig. S2** Transition properties and natural transition orbitals (NTOs) of the excited state for *m*-PO-ABN and *ρ*-PO-ABN (calculated at the Jaguar, B3LYP/6-31G\*\*).

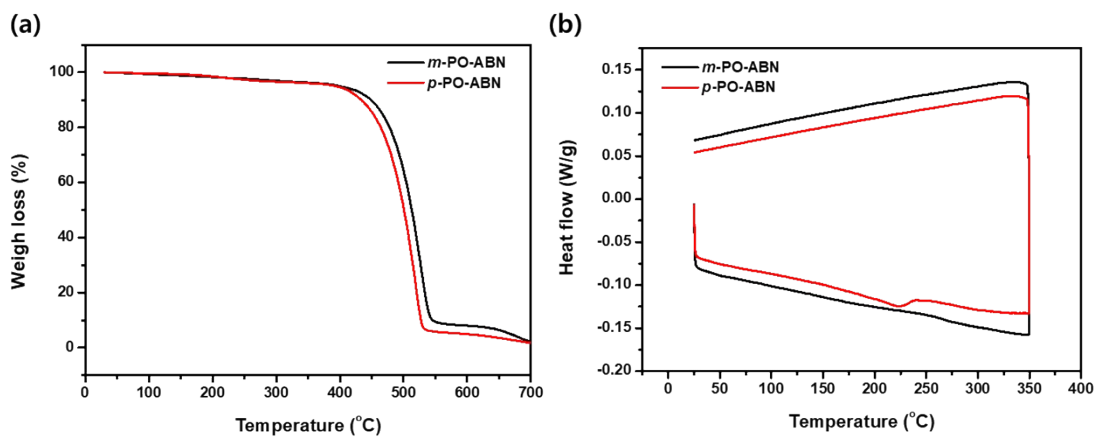

**Fig. S3** (a) TGA and (b) DSC curves of the synthesized compounds.

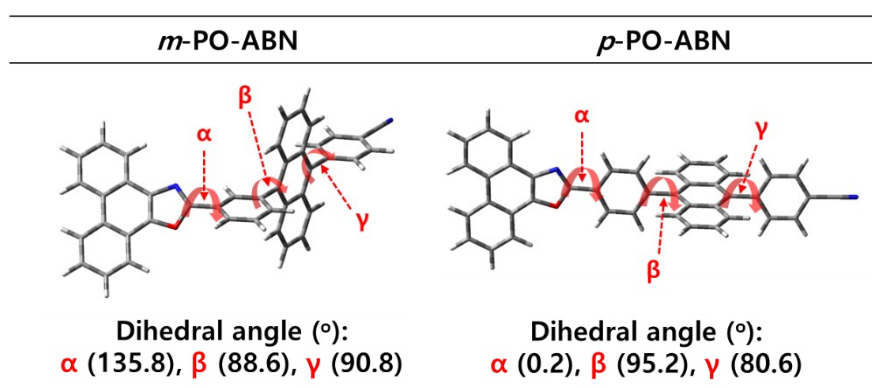

**Fig. S4** Optimization structure and dihedral angles of *m*-PO-ABN and *p*-PO-ABN (calculated at the B3LYP/6-31G(d)).

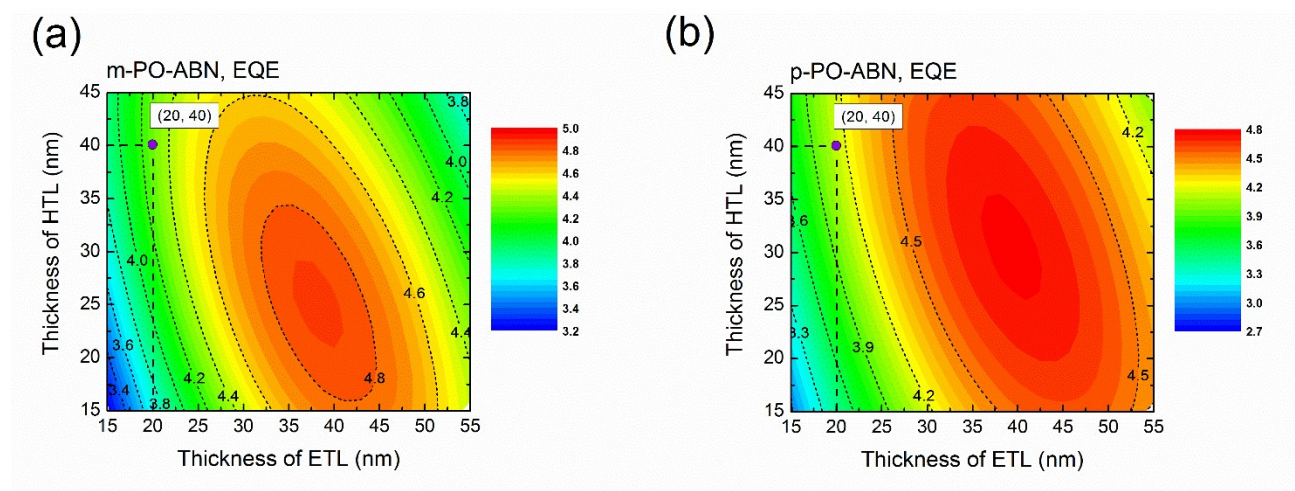

**Fig. S5** Calculated achievable external quantum efficiency of the OLEDs without triplet exciton harvesting via TTA ( $\eta_{\text{rad}} = 0.25$ ) as a function of ETL thickness and HTL thickness for (a) *m*-PO-ABN and (b) *p*-PO-ABN.
